# Supplementary material
Source: publisher site journal article supplement (https://www.dovepress.com/article/supplementary_file/569219/569219%20Supplementary%20Materials.docx)
Supplement: Supplementary file 1 [file 569219%20Supplementary%20Materials.docx]

**Supplementary Figure 1. Experimental timeline of the bleomycin (BLM)-induced pulmonary fibrosis model with disulfiram (DSF) treatment.
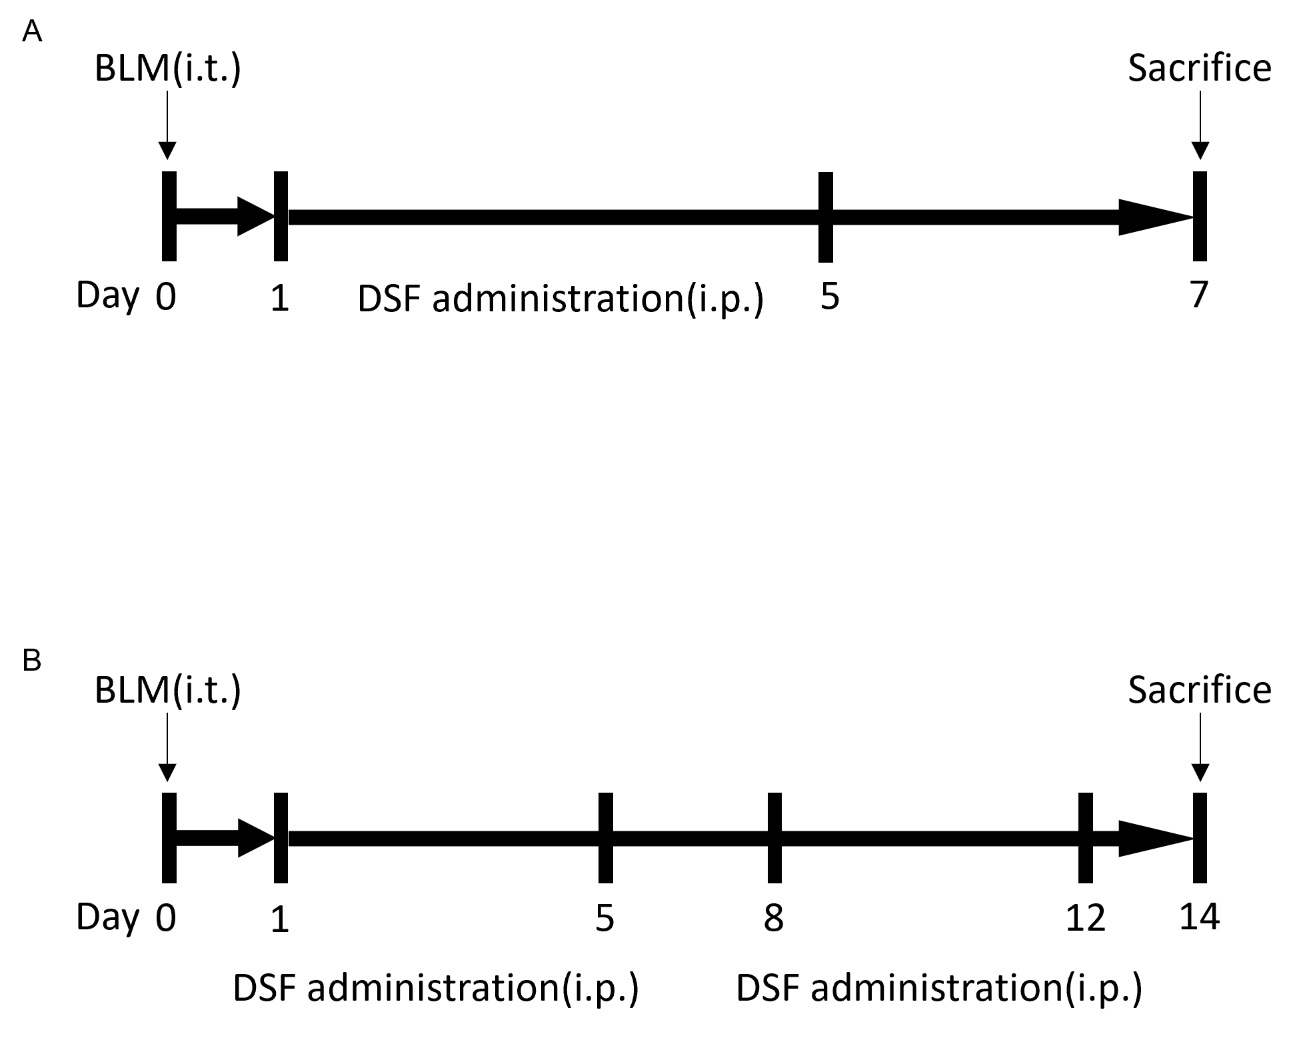
**

(A) For the day 7 endpoint, BLM was administered intratracheally on day 0, DSF was administered by intraperitoneal injection (i.p.) on days 1–5, and mice were sacrificed on day 7.
(B) For the day 14 endpoint, BLM was administered intratracheally on day 0, DSF was administered by intraperitoneal injection (i.p.) on days 1–5 and 8–12, and mice were sacrificed on day 14.

**Supplementary Figure 2. Representative immunofluorescence images of CXCR2 and GRK2 expression in peripheral blood cells.**

**
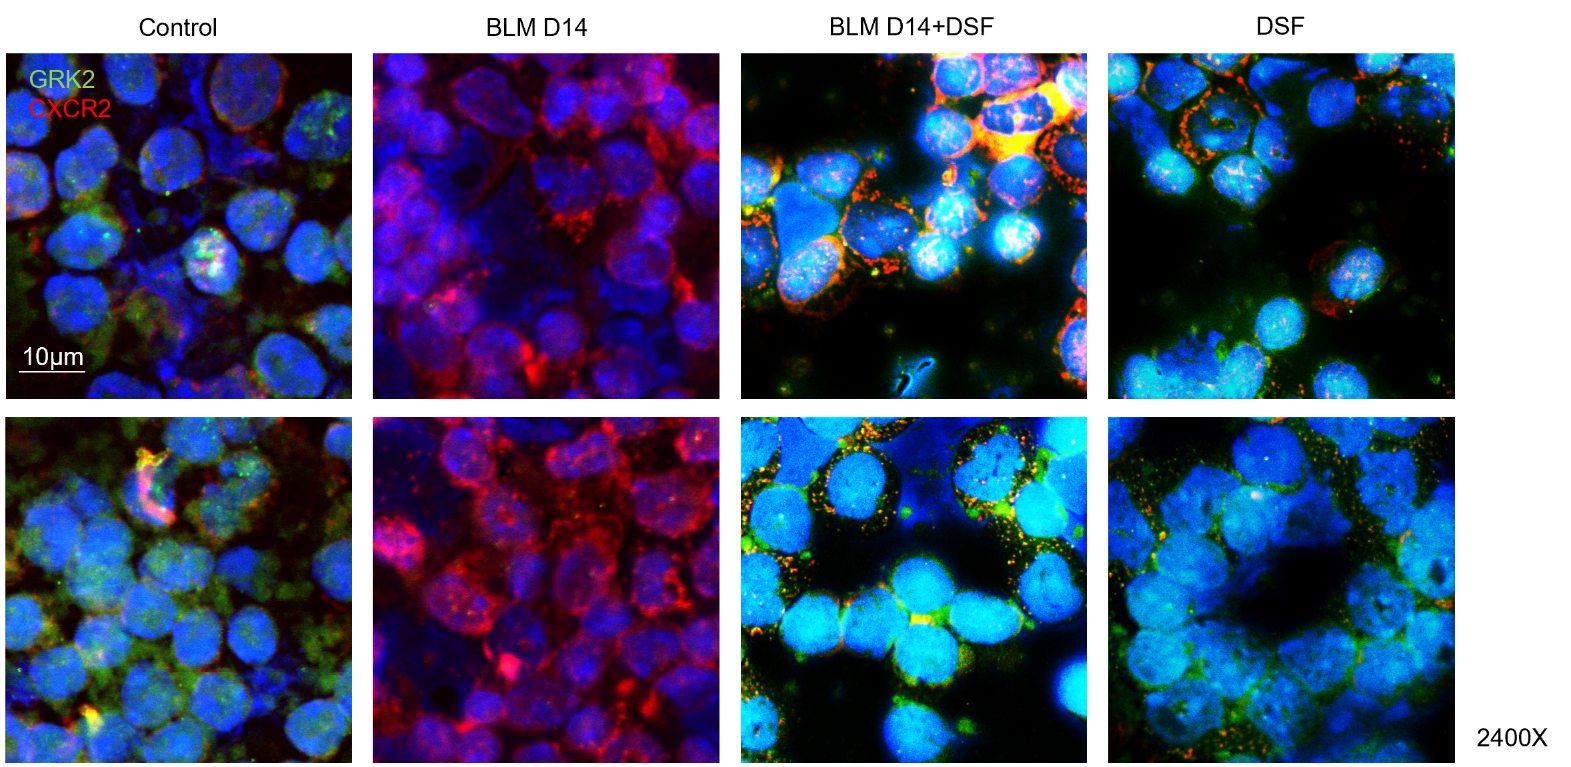
**Peripheral blood cells from the Control, BLM, BLM+DSF, and DSF groups were stained for GRK2 (green) and CXCR2 (red). Nuclei were counterstained with DAPI (blue). Scale bar = 10 μm.

**Supplementary Figure 3. Lactate Dehydrogenase (LDH) release assay in human pulmonary microvascular endothelial cells (HPMECs).**

**
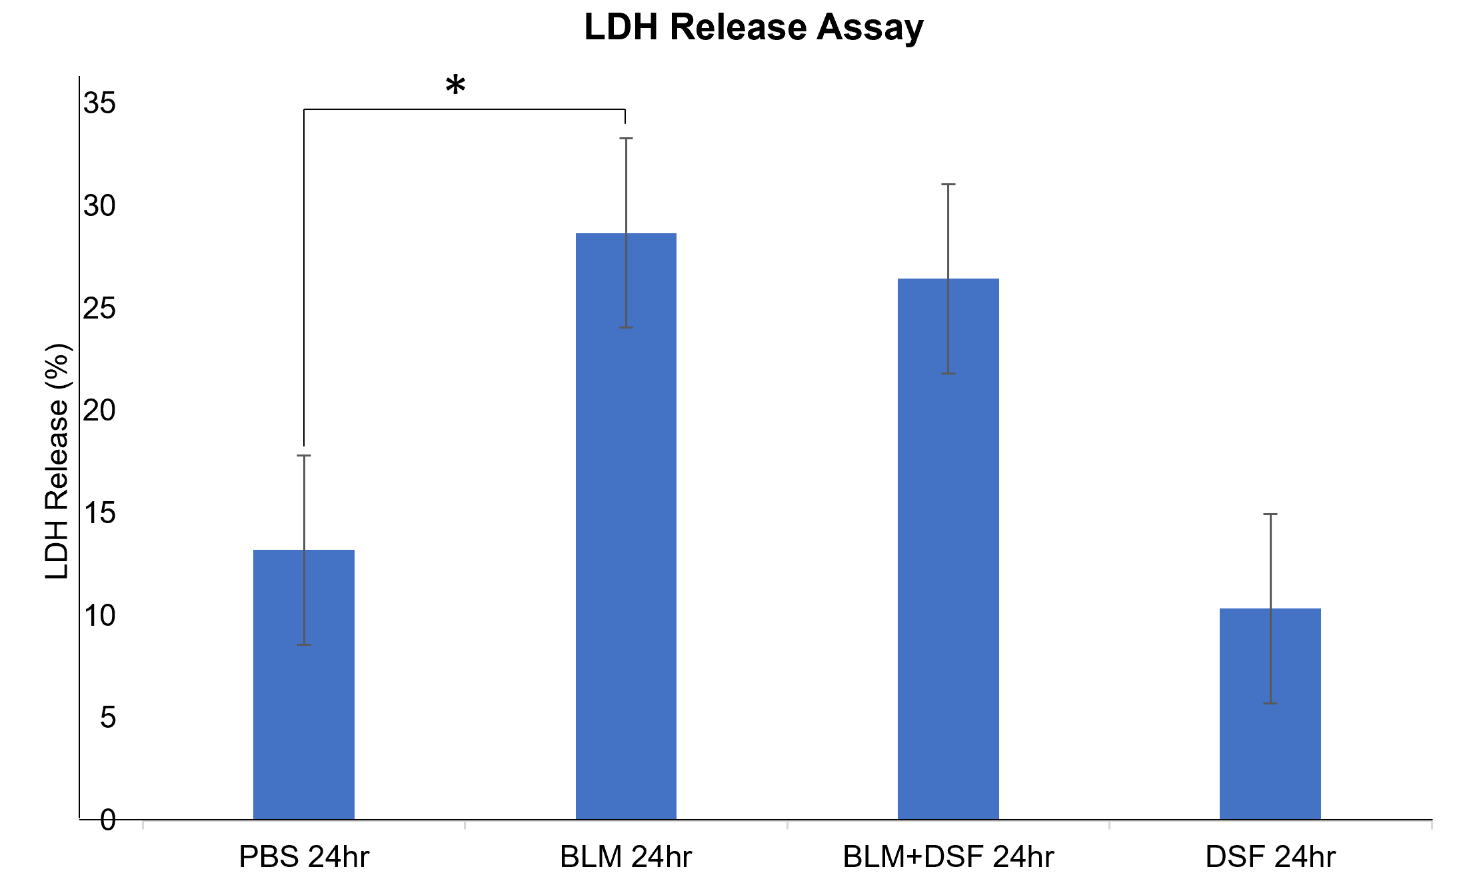
**
HPMECs were treated with PBS, BLM, BLM+DSF, or DSF for 24 h. LDH release is presented as percentage of total release. Data are presented as mean ± SD. *p < 0.05 compared with the PBS group.
